# Supplementary material
Source: Royal Society of Chemistry journal article supplement (doi:10.1039/d5ta09733a)
Supplement: d5ta09733a1.pdf [file d5ta09733a1.pdf]

## Supporting Information

# Two-step synthesized method strategy of long-range ordered and relaxor ferroelectrics achieves excellent electrical performance and thermal stability in BF-BT based Ceramics

Mingyue Mo, Hao Chen, Zhi Tan, Jie Xing<sup>1</sup>, Jianguo Zhu<sup>1</sup>

College of Materials Science and Engineering, Sichuan University, 610064, Chengdu, China

<sup>1</sup>Corresponding authors: xingjie@scu.edu.cn (J. Xing), nic0400@scu.edu.cn (J.G. Zhu)

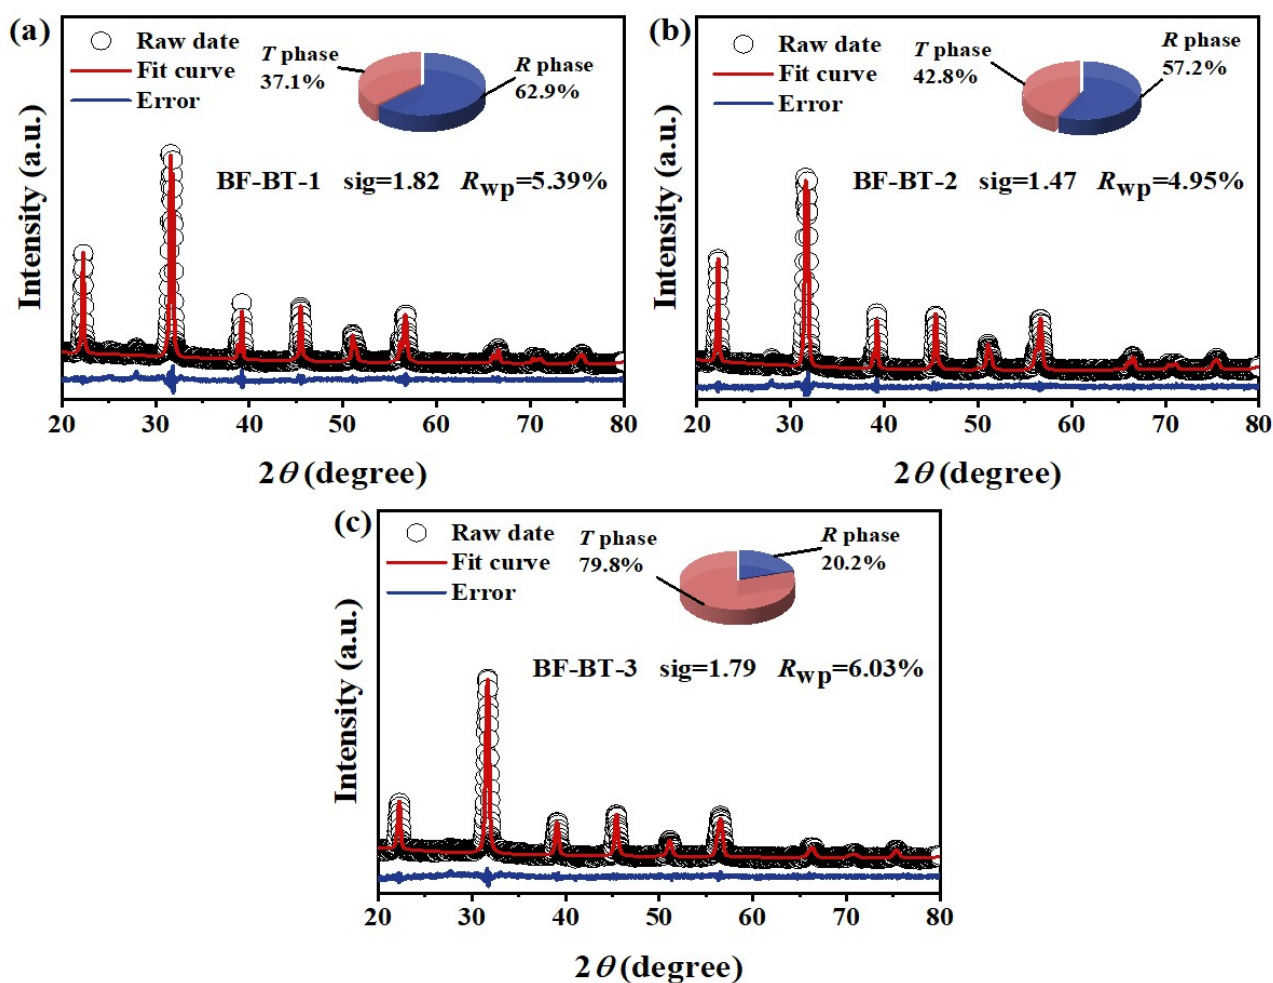

Fig. S1. (a-c) Rietveld refinement of crystal structures of BF-BT-1, BF-BT-2, BF-BT-3.

<sup>1</sup>Corresponding authors.

E-mail address: xingjie@scu.edu.cn (J. Xing), nic0400@scu.edu.cn (J.G. Zhu).

Table S1 Results of crystal parameters after structural refinement

| Parameters                    | BF-BT-1               |                       | BF-BT-2               |                       | BF-BT-3               |                       | BF-BT-4               |                       |
|-------------------------------|-----------------------|-----------------------|-----------------------|-----------------------|-----------------------|-----------------------|-----------------------|-----------------------|
| sig                           | 1.82                  |                       | 1.47                  |                       | 1.79                  |                       | 1.67                  |                       |
| $R_w$ (%)                     | 5.39                  |                       | 4.95                  |                       | 6.03                  |                       | 5.18                  |                       |
| phase content (%)             | <i>R</i> phase (62.9) | <i>T</i> phase (37.1) | <i>R</i> phase (57.2) | <i>T</i> phase (42.8) | <i>R</i> phase (20.2) | <i>T</i> phase (79.8) | <i>R</i> phase (49.4) | <i>T</i> phase (50.6) |
| Space group                   | <i>R3c</i>            | <i>P4mm</i>           | <i>R3c</i>            | <i>P4mm</i>           | <i>R3c</i>            | <i>P4mm</i>           | <i>R3c</i>            | <i>P4mm</i>           |
| <i>a</i> (Å)                  | 5.6151                | 4.0021                | 5.6165                | 3.9810                | 5.6258                | 3.9898                | 5.6213                | 3.9878                |
| <i>b</i> (Å)                  | 5.6151                | 4.0021                | 5.6165                | 3.9810                | 5.6258                | 3.9898                | 5.6213                | 3.9878                |
| <i>c</i> (Å)                  | 13.9110               | 3.9773                | 13.9071               | 4.0347                | 13.8005               | 4.0176                | 13.9062               | 4.0131                |
| Volume (Å <sup>3</sup> )      | 379.84                | 63.70                 | 379.93                | 63.94                 | 378.26                | 63.95                 | 380.55                | 63.8185               |
| $\alpha = \beta = \gamma$ (°) | 89.387                | 90                    | 89.406                | 90                    | 89.921                | 90                    | 89.466                | 90                    |

Table S2 Atomic positions after structural refinement

| Chemical Element            | BF-BT-1  |          |          | BF-BT-2  |          |          | BF-BT-3  |          |          | BF-BT-4  |          |          |
|-----------------------------|----------|----------|----------|----------|----------|----------|----------|----------|----------|----------|----------|----------|
|                             | <i>x</i> | <i>y</i> | <i>z</i> |
| -                           | <i>x</i> | <i>y</i> | <i>z</i> |
| Bi                          | 0.0000   | 0.0000   | 0.0000   | 0.0000   | 0.0000   | 0.0000   | 0.0000   | 0.0000   | 0.0000   | 0.0000   | 0.0000   | 0.0000   |
| Fe                          | 0.0000   | 0.0000   | 0.2417   | 0.0000   | 0.0000   | 0.2212   | 0.0000   | 0.0000   | 0.2212   | 0.0000   | 0.0000   | 0.2212   |
| O ( <i>R</i> )              | 0.5104   | 0.0278   | 0.8949   | 0.4430   | 0.0120   | 0.9543   | 0.4430   | 0.0120   | 0.9543   | 0.4430   | 0.0120   | 0.9543   |
| Ba                          | 0.0000   | 0.0000   | 0.0000   | 0.0000   | 0.0000   | 0.0000   | 0.0000   | 0.0000   | 0.0000   | 0.0000   | 0.0000   | 0.0000   |
| Ti                          | 0.5000   | 0.5000   | 0.5000   | 0.5000   | 0.5000   | 0.5000   | 0.4997   | 0.5000   | 0.4999   | 0.5000   | 0.5000   | 0.5000   |
| O <sub>1</sub> ( <i>T</i> ) | 0.5000   | 0.5000   | 0.0000   | 0.5003   | 0.5001   | 0.0003   | 0.5004   | 0.5003   | 0.0001   | 0.5001   | 0.5001   | 0.0001   |
| O <sub>2</sub> ( <i>T</i> ) | 0.5000   | 0.0000   | 0.5000   | 0.5003   | 0.0004   | 0.5004   | 0.5005   | 0.0003   | 0.5004   | 0.5005   | 0.0000   | 0.5003   |

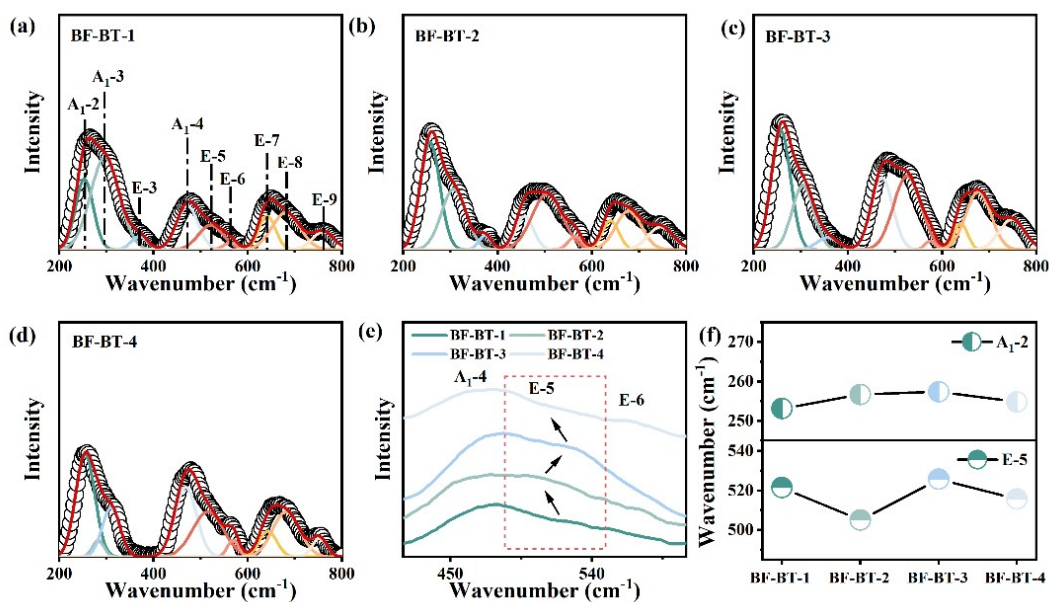

Fig. S2. (a-d) raman spectrum with Gaussian fitting curves; (e) the enlarged image of the E-5 peak; (f) content dependence of partial vibrational mode peaks.

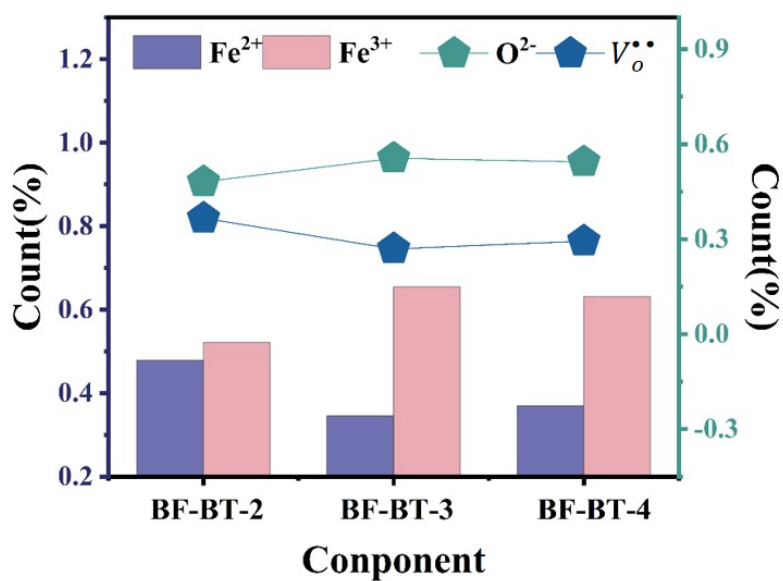

Figs. S3 Fe<sup>2+</sup>/Fe<sup>3+</sup> and O<sup>2-</sup>/V<sub>o</sub><sup>••</sup> relative content of BF-BT-2, BF-BT-3, and BF-BT-4;

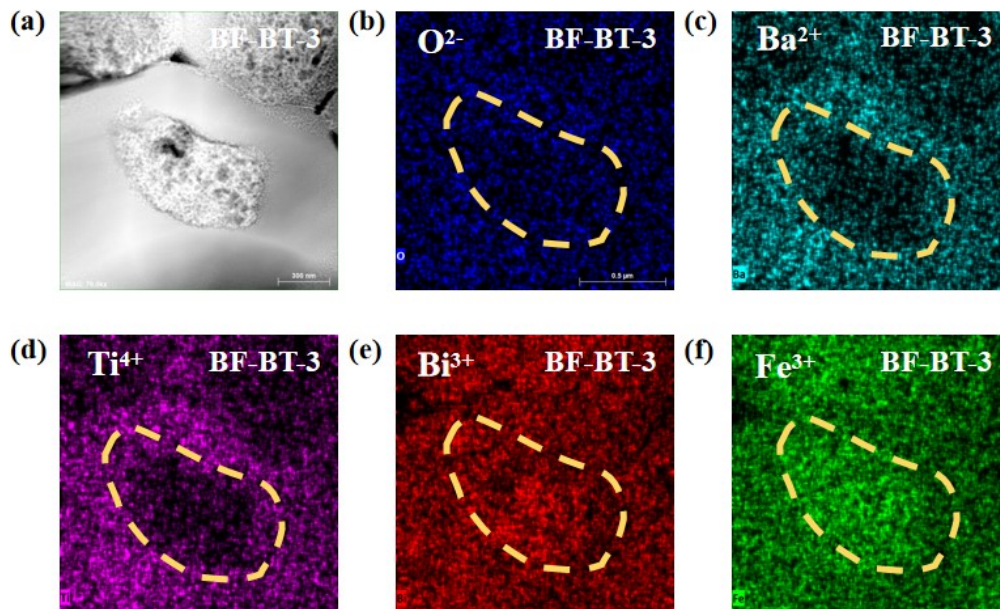

Fig. S4. (a-f) elemental distribution comparative mapping of Bi, Fe, Ba and Ti of BF-BT-3

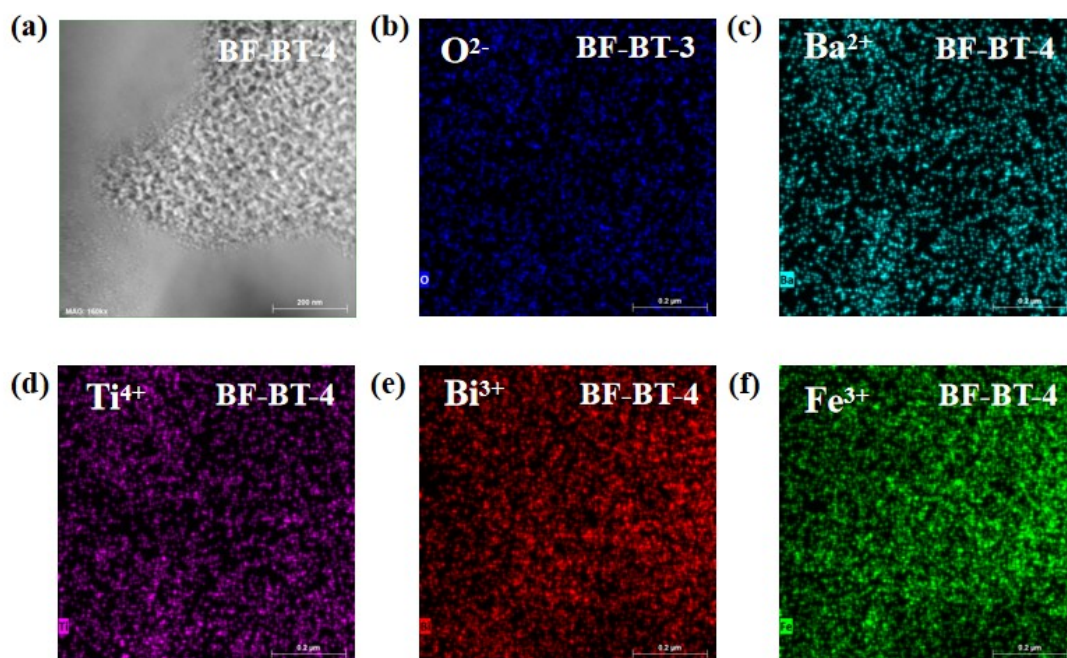

Fig. S5. (a-f) elemental distribution comparative mapping of Bi, Fe, Ba and Ti of BF-BT-4.

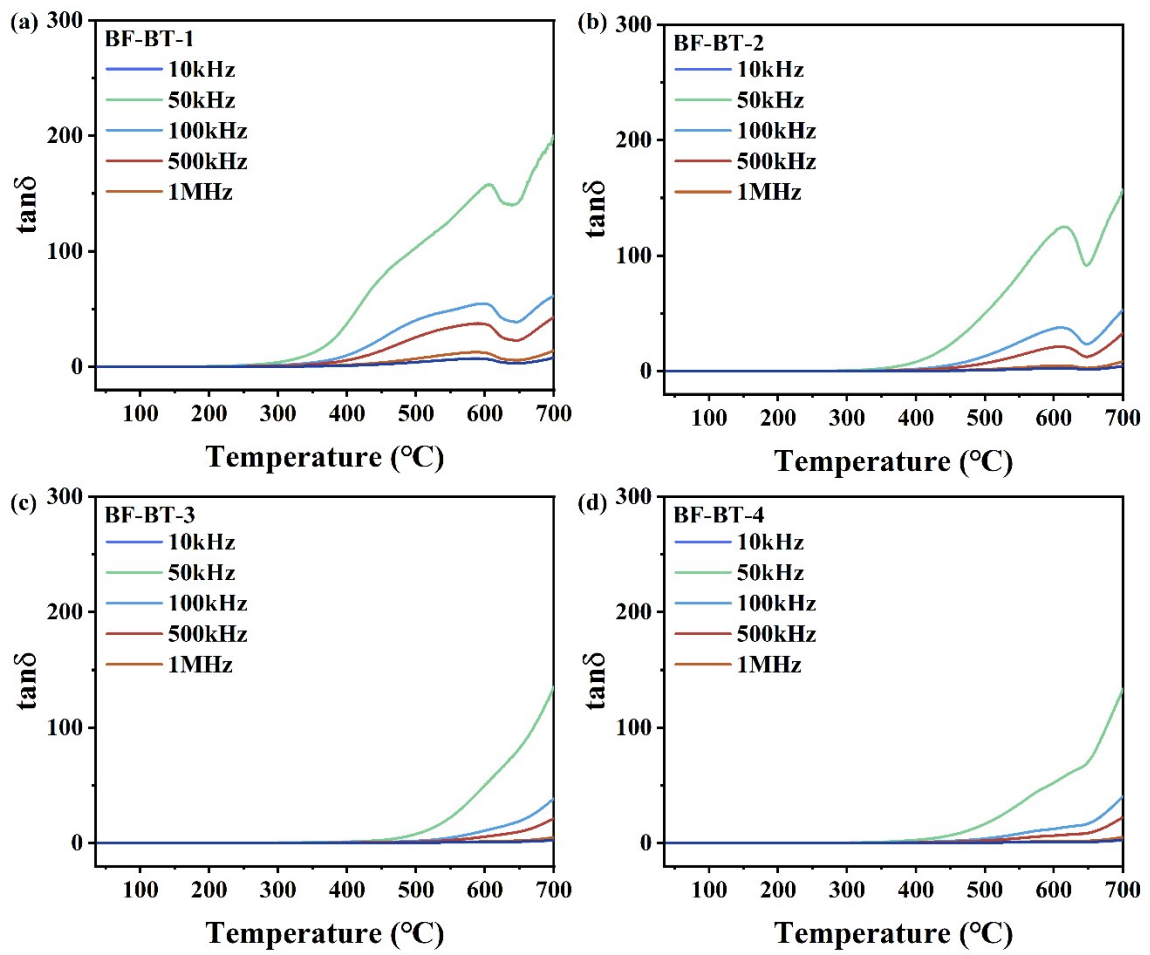

Fig. S6 The  $\tan\delta$ -T curves of BF-BT-1, BF-BT-2, BF-BT-3 and BF-BT-4.

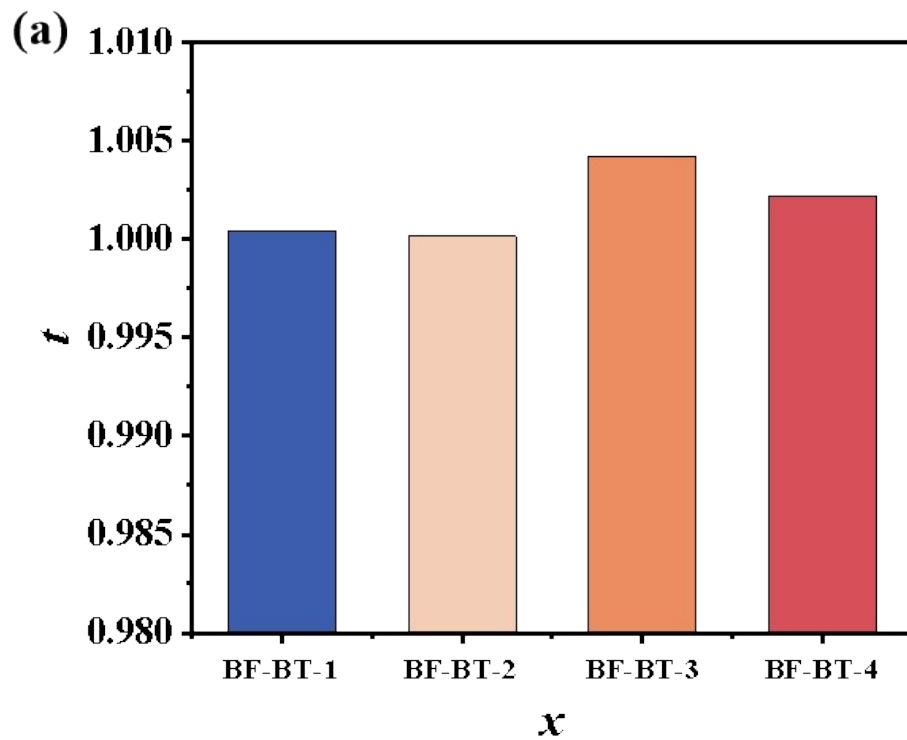

Fig. S7. (a) the tolerance factor  $t$  of BF-BT-1, BF-BT-2, BF-BT-3 and BF-BT-4.

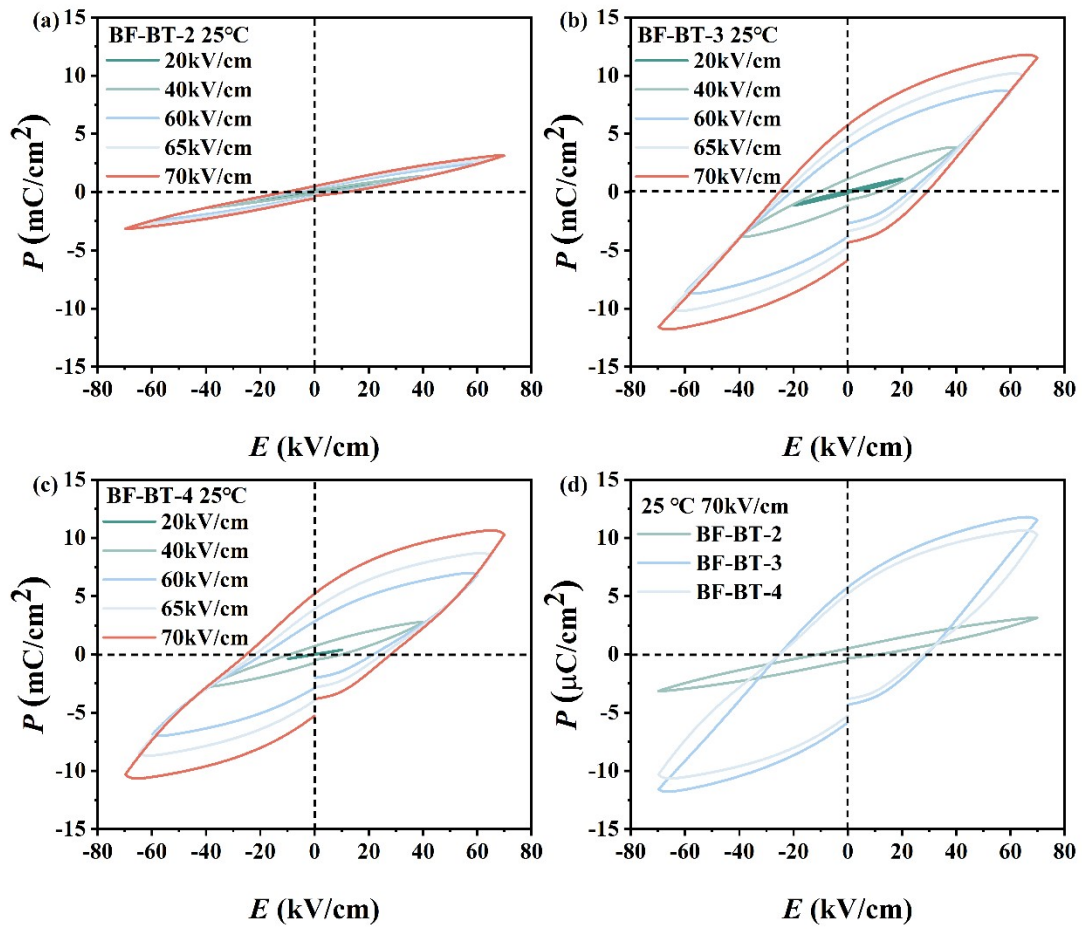

Figs. S8 (a-c) The hysteresis loops of BF-BT-2, BF-BT-3, and BF-BT-4 at room temperature (d) The component-dependent room-temperature hysteresis loops under the 70 kV/cm electric field.
